# Supplementary material for: Competitive annealing mediated isothermal amplification of nucleic acids
Source: Royal Society of Chemistry journal article supplement (doi:10.1039/c7an01569k), 2017-12-19
Supplement: c7an01569k1.pdf [file c7an01569k1.pdf]

1      **Competitive Annealing Mediated Isothermal Amplification of Nucleic Acids**

2      Rui Mao<sup>a, b, c</sup>, Lifei Qi<sup>a, b</sup>, Jianjun Li<sup>a</sup>, Ming Sun<sup>c</sup>, Zhuo Wang<sup>a, c\*</sup>, Yuguang Du<sup>a, c\*</sup>

3      <sup>a</sup> State Key Laboratory of Biochemical Engineering and Key Laboratory of  
4      Biopharmaceutical Production & Formulation Engineering, PLA, Institute of Process  
5      Engineering, Chinese Academy of Sciences, Beijing 100190, P.R. China.

6      <sup>b</sup> University of Chinese Academy of Sciences, Beijing 100049, P.R. China.

7      <sup>c</sup> Zhongke Xinray (Suzhou) biological Science Technologies Co. Ltd, Suzhou 215152,  
8      P.R. China.

9

10

11

12

13

14

15

16

17

18      \*To whom correspondence should be addressed:

19      E-mail: wangzhuo@ipe.ac.cn, ygdu@ipe.ac.cn

20      Phone: (86) 10-82545070

21      Fax: (86) 10-82545070

22      Full address: No.1 Bei-er-tiao, Zhong-guan-cun, Haidian, Beijing 100190, P.R. China.

23

24

25

## 26 ■ Experiment section

27 **Reagents and materials.** A 200-bp DNA fragment of the MERS-orf1a genome  
28 (GenBank: KX108946.1) with a T7 promoter sequence and two extra restriction  
29 enzyme sites (we named as Mor1a gene, fig. S1) was cloned into a pUC57-simple  
30 vector was provided by BGI Biological Engineering Technology and Services Co. Ltd  
31 (Shenzhen, China). The artificial RNA of Mor1a gene was prepared by using  
32 RiboMax™ Large Scale RNA Production Systems following the recommended  
33 instruction. The copy number of the plasmid was determined using the DNA copy  
34 number calculator which is available at <http://cels.uri.edu/gsc/cndna.html>.

35 Primers and probes were provided by BGI Biological Engineering Technology and  
36 Services Co. Ltd (Shenzhen, China). The *Bst* 2.0 WarmStart DNA polymerase, AMV  
37 Reverse Transcriptase and 10× ThermoPol reaction buffer (including 200 mM Tris-  
38 HCl, 100 mM KCl, 100 mM (NH<sub>4</sub>)<sub>2</sub>SO<sub>4</sub>, 20 mM MgSO<sub>4</sub>, and 1% Triton X-100) were  
39 purchased from New England BioLabs (Ipswich, MA, USA). Deoxynucleotide  
40 triphosphates (dNTPs) and RiboMax™ Large Scale RNA Production Systems were  
41 from Promega (Madison, WI, USA). Eva Green and GelRed was obtained from  
42 Biotium (Hayward, CA, USA). Restricted enzymes were purchased from Thermo  
43 Fisher Scientific (Shanghai, China). DNA purification kit and Nuclease-free water were  
44 purchased from Tiangen Biotech Co., Ltd. (Beijing, China). Other reagents, unless  
45 specified, were obtained from Sigma-Aldrich (St. Louis, MO, USA).

46 **Instruments.** The real-time fluorescence detection of nucleic acid was performed  
47 using StepOne™ Real-Time PCR detection system (The Applied Biosystems) at 1-min  
48 intervals. Gels were imaged by Tanon 4100 Gel Image Analysis System (Tanon Science  
49 & Technology Co., Ltd.). Nucleic acid concentrations were measured by Quawell UV-  
50 Vis Spectrophotometer Q5000 (Quawell Technology, Inc.).

51 **Reaction mixture for CAMP and modified CAMP reaction.** The assays were  
52 carried out in 25 µl reaction mixtures containing the following components: 8 U *Bst* 2.0  
53 WarmStart DNA polymerase, 2.5 µl 10× ThermoPol reaction buffer, 1 M betaine, 6  
54 mM MgSO<sub>4</sub>, 1.4 mM of each dNTP, and an appropriate amount of nucleic acid

55 template. The amount of primers needed for CAMP reaction was 1.6  $\mu\text{M}$  for NF and  
56 NR, with the addition of outer primers, loop primers and the combination primers  
57 system termed as O-CAMP, L-CAMP, and OL-CAMP, respectively. For O-CAMP,  
58 another for F2 (0.2  $\mu\text{M}$ ) and R2 (0.2  $\mu\text{M}$ ) were added; For L-CAMP, another NLF (0.8  
59  $\mu\text{M}$ ) and NLR (0.8  $\mu\text{M}$ ) were added; and for OL-CAMP, another F2 (0.2  $\mu\text{M}$ ) and R2  
60 (0.2  $\mu\text{M}$ ), 0.8  $\mu\text{M}$  NLF (0.8  $\mu\text{M}$ ) and NLR (0.8  $\mu\text{M}$ ) were added. As to reverse  
61 transcription CAMP (RT-CAMP), just another 5 U AMV Reverse Transcriptase were  
62 added into reaction mixture. The reactions were incubated at 63°C and heating at 80°C  
63 for 10 min to terminate the reaction.

64 **Reaction mixture for LAMP reaction.** The assays were carried out in 25  $\mu\text{l}$  reaction  
65 mixtures containing the following components: 8 U *Bst* 2.0 WarmStart DNA  
66 polymerase, 2.5  $\mu\text{l}$  10 $\times$  ThermoPol reaction buffer, 1 M betaine, 6 mM  $\text{MgSO}_4$ , 1.4 mM  
67 of each dNTP, and an appropriate amount of nucleic acid template. The amount of  
68 primers needed for CAMP reaction was 1.6  $\mu\text{M}$  for FIP and BIP, 0.2  $\mu\text{M}$  for F3 and  
69 B3. As to reverse transcription LAMP (RT-LAMP), just another 5 U AMV Reverse  
70 Transcriptase were added into reaction mixture.

71 **Gel electrophoresis of CAMP, O-CAMP, L-CAMP and OL-CAMP products.**  
72 The amplification products were detected by fluorescence monitoring using a real-time  
73 PCR. After the amplification, part of the products was digested by *Xho*I, *Hind*III, and  
74 both respectively, then analyzed by 1% agarose gel in 1 $\times$  TAE buffer (40 mM Tris-  
75 acetate, 1 mM EDTA, pH 8.0). The gels were stained with GelRed and visualized by  
76 UV transillumination using 4100 Gel Image Analysis System.

77

78 Table S1. Primer sequences of NF, NR, F2, R2, NLF and NLR targeting the Mor1a gene.

| Primer    | 5'→3'                                      |
|-----------|--------------------------------------------|
| Mor1a-NF  | CAGGCAACAAGAAAAGTGTC-ATTTGTGACTATGGCCTTCG  |
| Mor1a-NR  | GACACTTTTCTTGTTCCTG-TGGGAGTAGTGGGCTCGTAGAC |
| Mor1a- F2 | ATTCCCACACAGTTGTTC                         |
| Mor1a-R2  | TGCAATCAGCGCTGACGAA                        |
| Mor1a-NLF | CGAGAAACACAAACACACC                        |
| Mor1a-NLR | TGGGAGTAGTGGGCTCGTAGAC                     |

ACTATTCCCACACAGTTGTTCCCACTCTTATTGTGACTATGGCCTTCGT  
Mo1a-F2 Mo1a-F1  
TATGTTGTTGGTTCTCGAGAAACACAAACACACCTTTTGTGACACTTTTC  
XhoI Mo1a-LF Mo1a-N  
TTGTTGCCTGTGGCTATTTGTTTGACTTATGCAAGCTTAACATAGTCTA  
Mo1a-LRc HindIII  
CGAGCCCACTACTCCCATTTTCGTACGCGCTGATTGCAGTTGCAAATTGG  
Mo1a-R1c Mo1a-R2c

79 Figure S1. Localization of primers and restriction enzyme cutting sites in the nucleotide sequence of  
80 modified MERS-orf1a (part).  
81

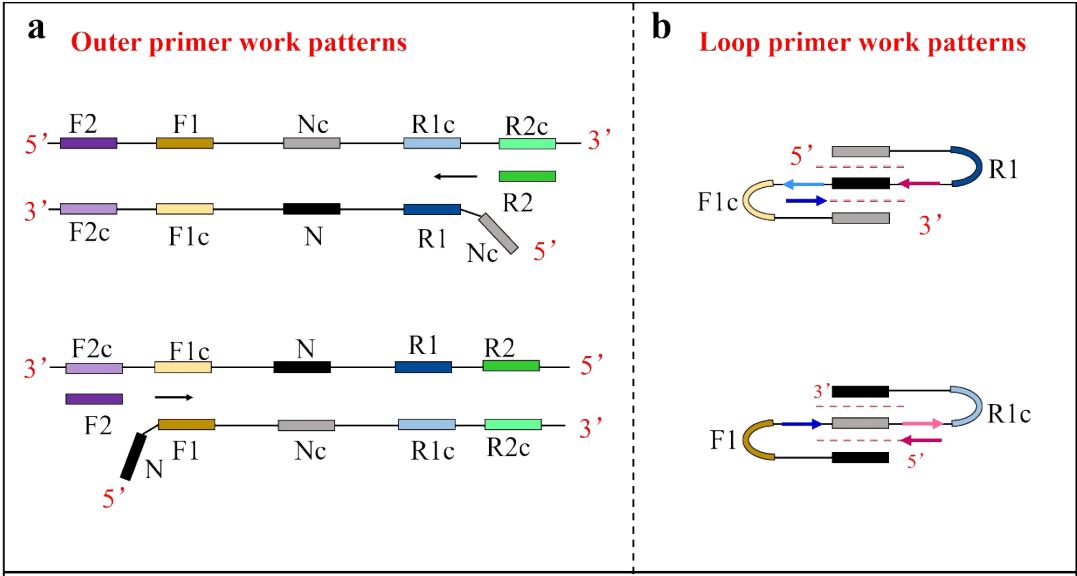

82 Figure S2. (a) Representative scheme for work pattern of the outer primers. (b) Representative scheme  
83 for work pattern of the loop primers.

84

85 Table S2. (a) Primer sequences of CAMP and LAMP targeting the H1N1 gene (GenBank: GQ290690.1).

|      | Primer   | 5'→3'                                               |
|------|----------|-----------------------------------------------------|
| CAMP | H1N1-NF  | CTCACTAGCATCAGGATAACAGGGTTGAATGCCCCTAATTACC         |
|      | H1N1-NR  | CCTGTTATCCTGATGCTAGTGAGCGATTTGAACCATGCCAATTGTCC     |
|      | H1N1-F2  | ATGGTCAGGCTTCATACAAG                                |
|      | H1N1-R2  | ATTCTGATTGAAGAACACCC                                |
| LAMP | H1N1-FIP | TAAAGCAAGAACCATTAATGCAGGCTTGGAGAAACAACATATTGAG<br>G |
|      | H1N1-BIP | CCATAATGACTGATGGACCAAGTAAGTATTTACTACCTTCCCTT        |
|      | H1N1-F3  | GGCATAATAACAGATACTATCAAGA                           |
|      | H1N1-B3  | AGGAACACTCTTCATAGTGG                                |

86 (b) Sequence of H1N1 gene (GQ290690.1, partially):

87 TCCGGCCCAGACAATGGGGCAGTGGCTGTATTGAAGTACAATGGCATAATAACAGATACT  
88 ATCAAGAGTTGGAGAAACAACATATTGAGGACACAAGAATCTGAATGTGCCTGCATTAAT  
89 GGTCTTGCTTTACCATAATGACTGATGGACCAAGTAATGGTCAGGCTTCATACAAGATTT  
90 TCAAAATAGAAAAGGGAAAGGTAGTAAAATCAGTTGAGTTGAATGCCCCTAATTACCACT  
91 ATGAAGAGTGTTCTGTTATCCTGATGCTAGTGAGGTGATGTGTGTATGCAGGGACAATTG  
92 GCATGGTTCAAATCGGCCATGGGTGTTCTTCAATCAGAATCTAGAGTATCAAATAGGATAT  
93 ATATGCAGCGGAGTT

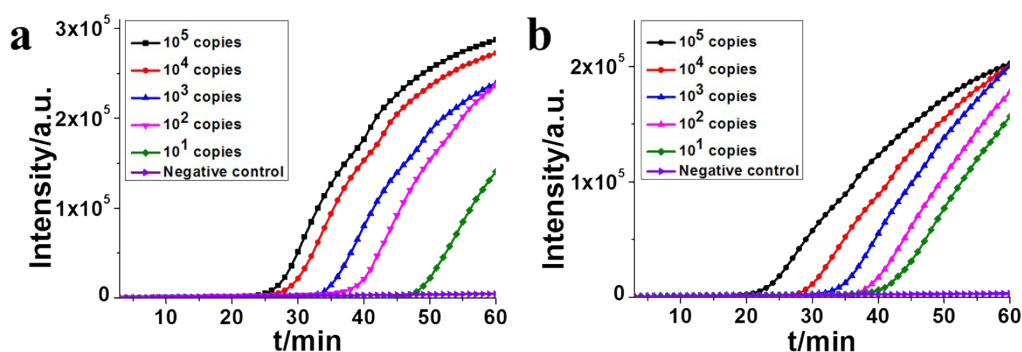

94 Figure S3. Comparison of the sensitivity of O-CAMP and LAMP through analysis of serially diluted  
95 H1N1 DNA. Reactions were performed at 63 °C for 60 min. The DNA concentrations were as follows:  
96 10<sup>5</sup> copies, 10<sup>4</sup> copies, 10<sup>3</sup> copies, 10<sup>2</sup> copies, 10<sup>1</sup> copies and negative control (nuclease-free water). (a):  
97 Isothermal amplification plot of CAMP with outer primer. (b): Isothermal amplification plot of LAMP.
